# Supplementary material
Source: PubMed Central journal article supplement (PMC3567784)
Supplement: supp_cvs349_cvs349supp.pdf [file supp_cvs349_cvs349supp.pdf]

## Supplementary information, Table S1

| Genotype                                    | Total cholesterol | HDL cholesterol | LDL/VLDL cholesterol | Triglyceride | Body weight (g) |
|---------------------------------------------|-------------------|-----------------|----------------------|--------------|-----------------|
| <i>Ccr7<sup>+/+</sup>ApoE<sup>-/-</sup></i> | 848 ± 245         | 21 ± 4          | 742 ± 192            | 201 ± 16     | 24.67 ± 0.66    |
| <i>Ccr7<sup>-/-</sup>ApoE<sup>-/-</sup></i> | 761 ± 279         | 30 ± 7          | 627 ± 170            | 191 ± 17     | 24.72 ± 0.37    |

**Supplemental Table S1.** *Ccr7* deficiency does not affect lipid profiles or body weight in the *ApoE<sup>-/-</sup>* mouse model of atherosclerosis. Female *Ccr7<sup>-/-</sup>ApoE<sup>-/-</sup>* and *Ccr7<sup>+/+</sup>ApoE<sup>-/-</sup>* mice (n=10 – 15 mice per group) were 14 weeks old and had been on a Western Diet for 8 weeks at the time of euthanasia. Data are the mean ± SEM. Lipid values are in mg/dL.

## Supplementary information, Figure S1

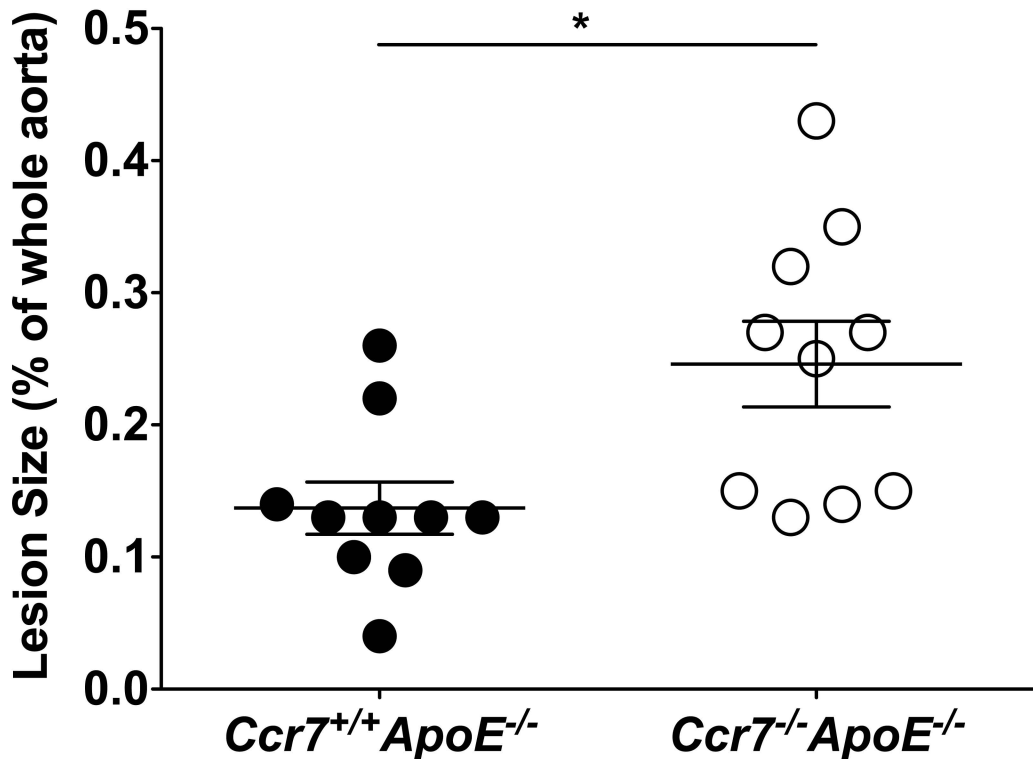

**Supplemental Figure S1:** *Ccr7* deficiency increases atherogenesis in *ApoE*<sup>-/-</sup> mice. The atherosclerotic lesion size in *Ccr7*<sup>+/+</sup>*ApoE*<sup>-/-</sup> and *Ccr7*<sup>-/-</sup>*ApoE*<sup>-/-</sup> mice were quantified as percentage of the whole aorta (female, 14 weeks on Chow diet, n=10 mice per group, \**P* = 0.010).

## Supplementary information, Figure S2

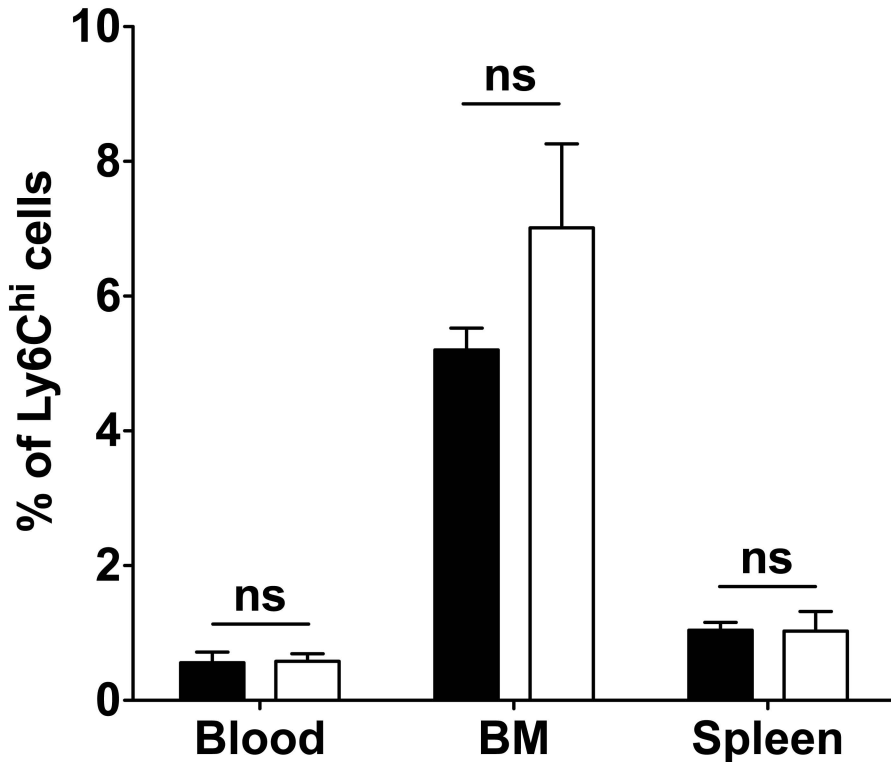

**Supplemental Figure S2:** *Ccr7* deficiency does not affect the percentage of Ly6C<sup>hi</sup> monocytes in the blood, bone marrow (BM) or the spleen of *ApoE*<sup>-/-</sup> mice. Cells from the blood, BM and spleen of *Ccr7*<sup>+/+</sup>*ApoE*<sup>-/-</sup> and *Ccr7*<sup>-/-</sup>*ApoE*<sup>-/-</sup> mice (female, 8 weeks on Western diet, n=4 mice per group) were subjected to FACS analysis and CD11b<sup>+</sup>Ly6C<sup>hi</sup>7/4<sup>hi</sup>Ly6G<sup>-</sup> cells were defined as Ly6C<sup>hi</sup> inflammatory monocytes (ns,  $P > 0.05$ ).

## Supplementary information, Figure S3

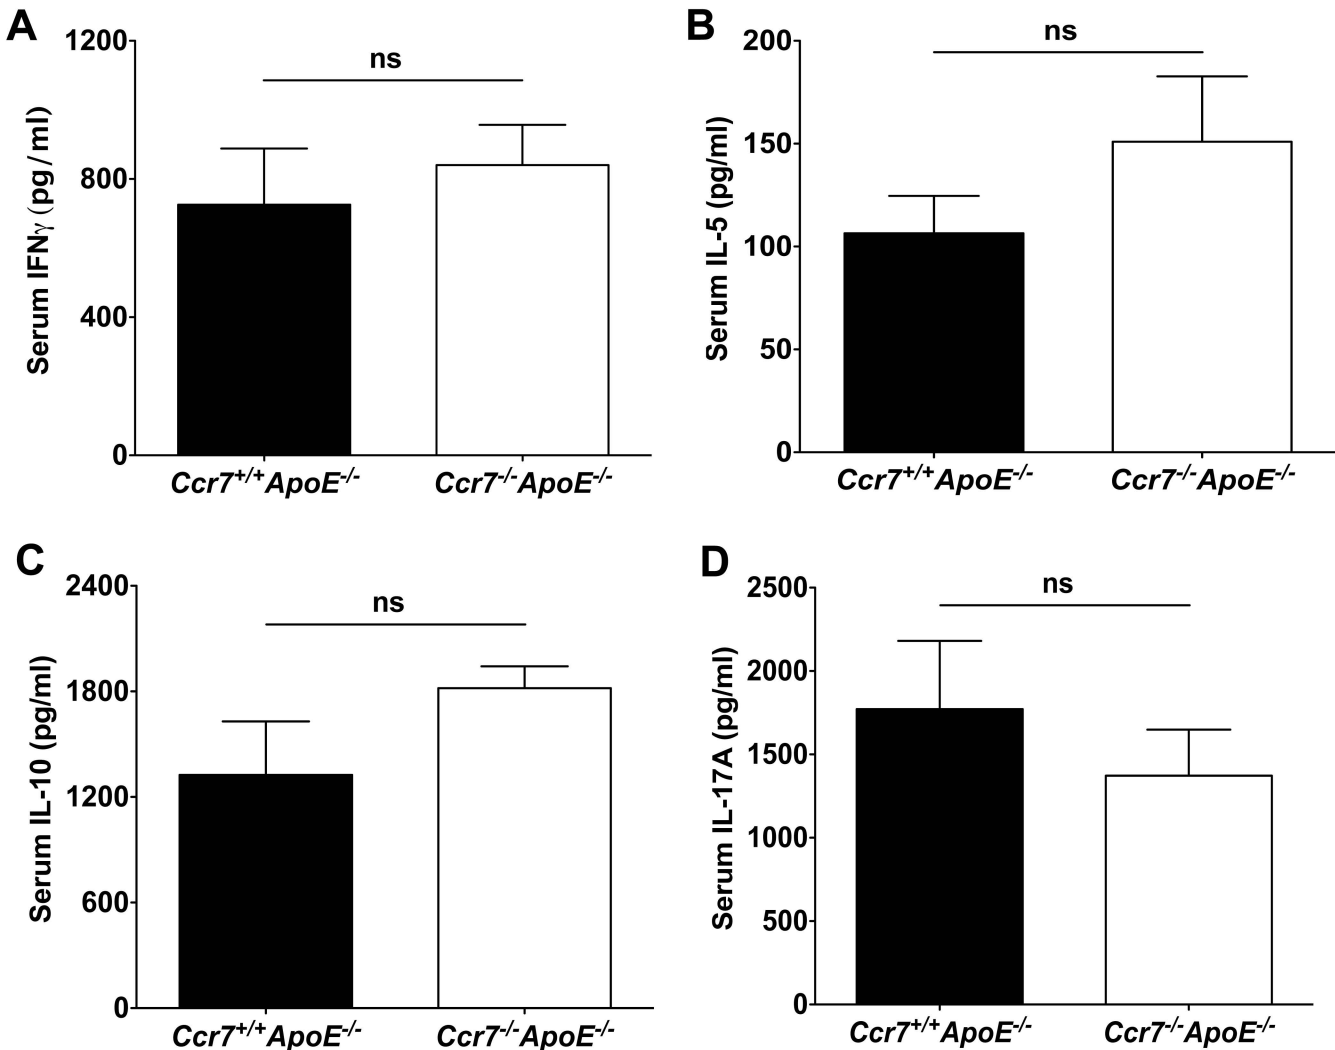

**Supplemental Figure S3:** *Ccr7* deficiency does not affect the levels of IFN $\gamma$  (A), IL-5 (B), IL-10 (C) or IL-17A (D) in the blood of *ApoE*<sup>-/-</sup> mice. Serum levels of these cytokines were measured in the plasma of *Ccr7*<sup>+/+</sup>*ApoE*<sup>-/-</sup> and *Ccr7*<sup>-/-</sup>*ApoE*<sup>-/-</sup> mice (female, 8 weeks on Western diet, n=10 mice per group) by luminex assay (ns,  $P > 0.05$ ).

## Supplementary information, Figure S4

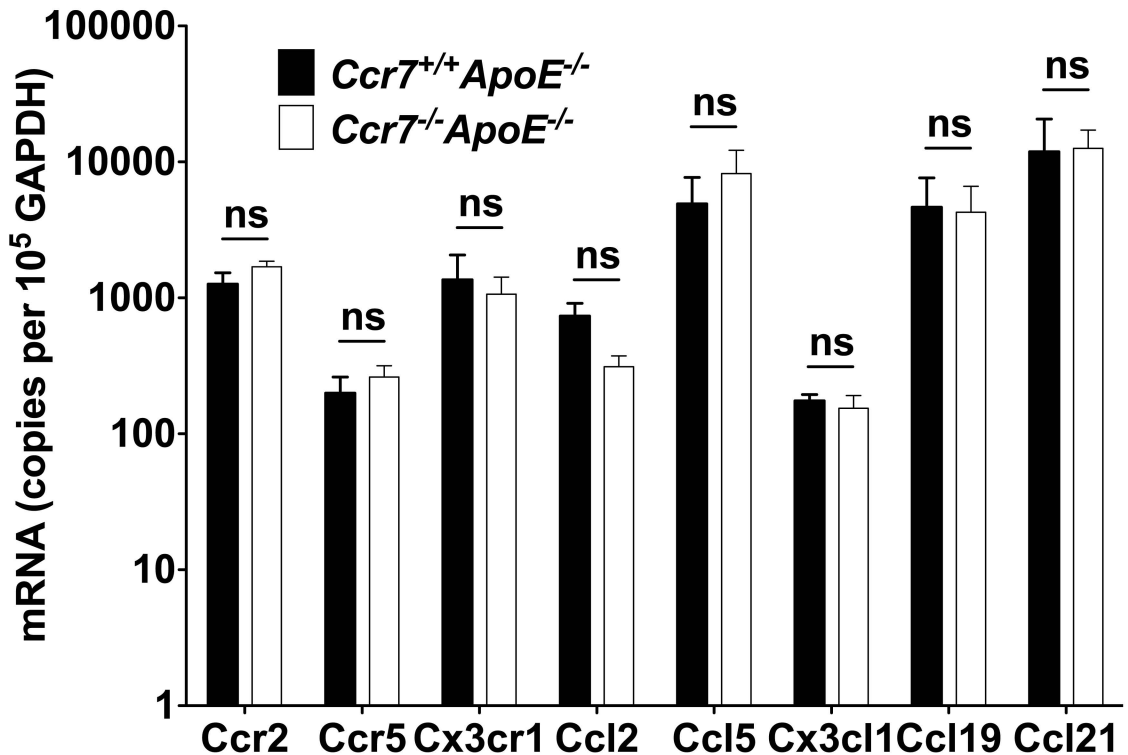

**Supplemental Figure S4:** *Ccr7* deficiency does not affect the expression of other chemokine receptors and chemokines (*Ccr2*, *Ccr5*, *Cx3cr1* and *Ccl2*, *Ccl5*, *Cx3cl1*, *Ccl19*, *Ccl21*) involved in atherosclerosis in *ApoE*<sup>-/-</sup> mice. Real-time PCR was used to analyze the RNA expression in aortas from *Ccr7*<sup>+/+</sup>*ApoE*<sup>-/-</sup> and *Ccr7*<sup>-/-</sup>*ApoE*<sup>-/-</sup> mice (female, 8 weeks on Western diet, n=4 mice per group) (ns,  $P > 0.05$ ).
